# Supplementary material for: Large, thermally stabilized and fatigue-resistant piezoelectric strain response in textured relaxor-PbTiO3ferroelectric ceramics
Source: Royal Society of Chemistry journal article supplement (doi:10.1039/d0tc05023g), 2020-12-23
Supplement: d0tc05023g1.pdf [file d0tc05023g1.pdf]

## Supporting Information

### Large, thermally stabilized and fatigue-resisted piezoelectric strain in textured relaxor-PbTiO<sub>3</sub> ferroelectric ceramics

Yunfei Chang,<sup>a,§,\*</sup> Jie Wu,<sup>a,§</sup> Bin Yang,<sup>a</sup> Hang Xie,<sup>a</sup> Shuai Yang,<sup>b</sup> Yuan Sun,<sup>a</sup> Shantao Zhang,<sup>c</sup> Fei Li,<sup>b</sup> Wenwu Cao<sup>a, d</sup>

<sup>a</sup> Condensed Matter Science and Technology Institute, School of Instrumentation Science and Engineering, Harbin Institute of Technology, Harbin 150080, China. Email: [changyunfei@hit.edu.cn](mailto:changyunfei@hit.edu.cn)

<sup>b</sup> Electronic Materials Research Laboratory (Key Lab of Education Ministry), State Key Laboratory for Mechanical Behavior of Materials and School of Electronic Science and Engineering, Xi'an Jiaotong University, Xi'an 710049, China.

<sup>c</sup> National Laboratory of Solid State Microstructures and Department of Materials Science and Engineering, Nanjing University, Nanjing 210093, China

<sup>d</sup> Materials Research Institute and Department of Mathematics, The Pennsylvania State University, University Park, PA 16802, USA

<sup>§</sup> These authors contributed equally to this work.

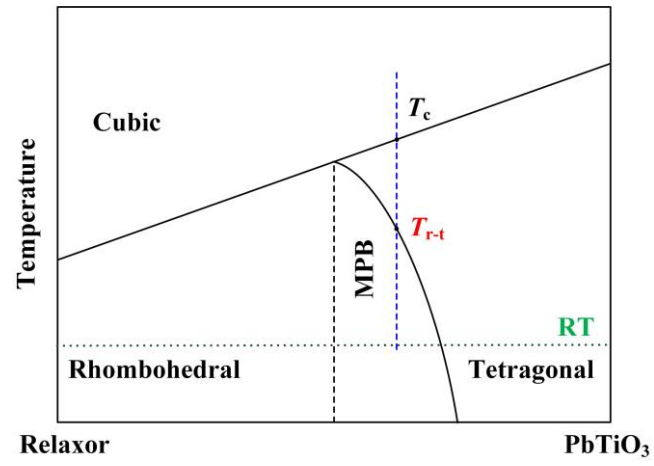

Fig.S1 Schematic phase diagram for relaxor-PbTiO<sub>3</sub> based ferroelectrics.

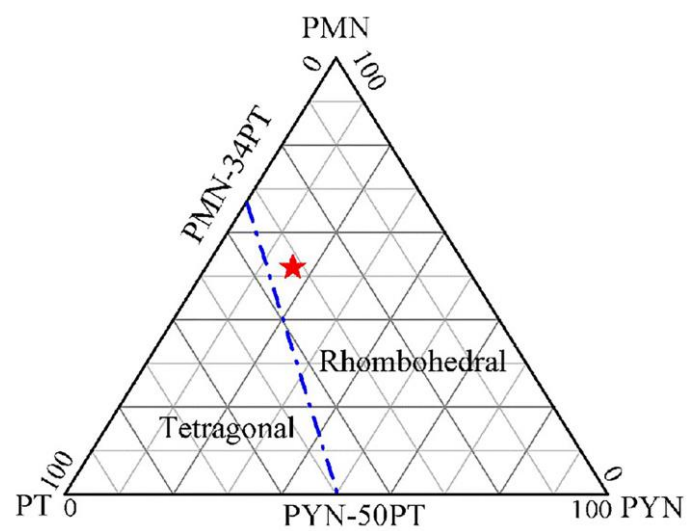

Fig.S2 Phase diagram showing the location of 0.16PYN-0.52PMN-0.32PT studied here.

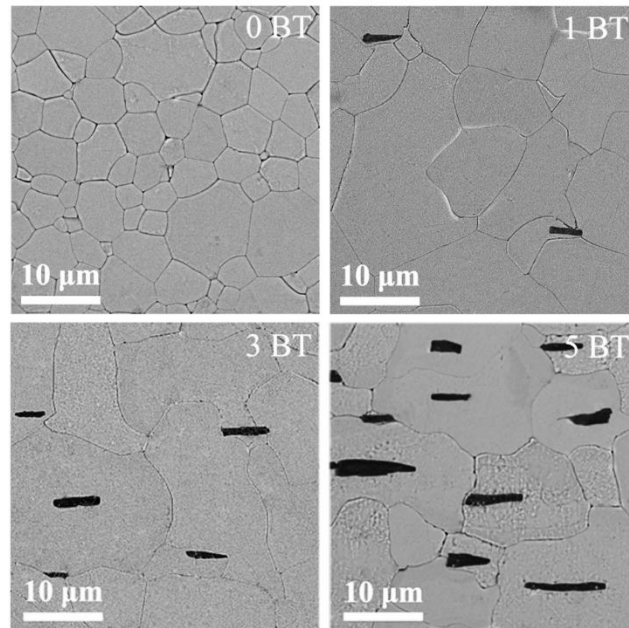

Fig.S3 SEM images of the PYN-PMN-PT ceramics with 0 vol.% (0BT), 1 vol.% (1BT), 3 vol.% (3BT) and 5 vol.% (5BT) BT templates.

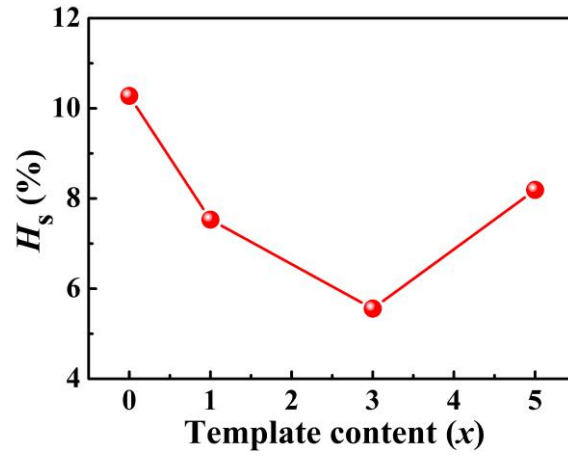

Fig.S4 Strain hysteresis  $H_s$  of the PYN-PMN-PT ceramics as a function of BT template concentration ( $x$  vol.%).

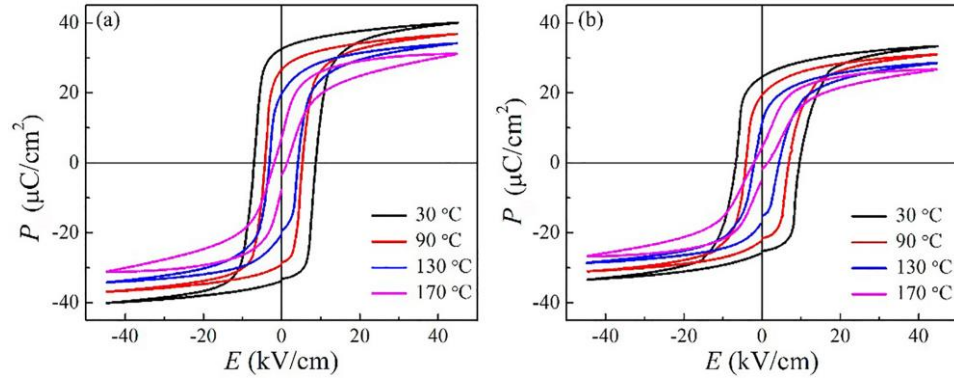

Fig.S5 Polarization vs. electric field ( $P$ - $E$ ) hysteresis loops of (a) the randomly oriented and (b) 3 vol.% BT textured PYN-PMN-PT ceramics measured at selected temperatures.

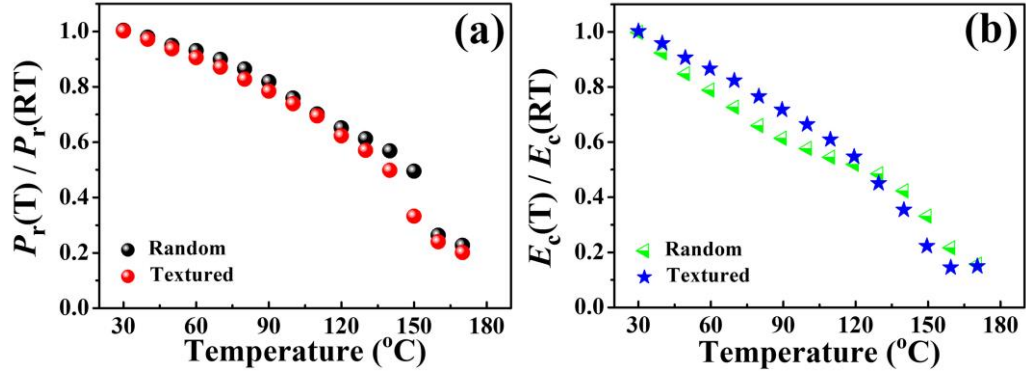

Fig.S6 Temperature dependence of normalized (a)  $P_r$  (i.e.,  $P_r = (P_r^+ - P_r^-)/2$ ) and (b)  $E_c$  for randomly oriented and 3 vol.% BT textured PYN-PMN-PT ceramics.

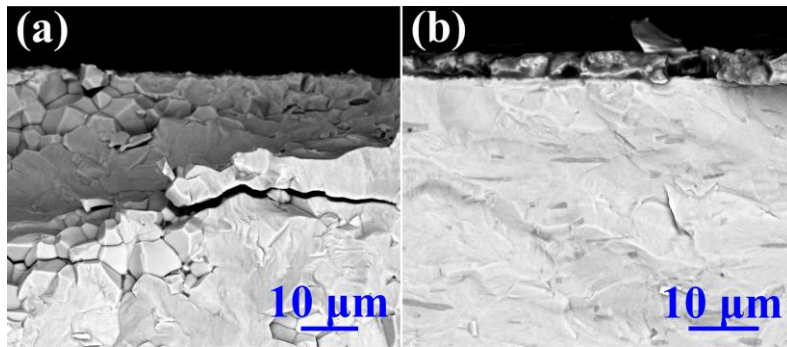

Fig. S7 SEM images of fracture surfaces of (a) randomly oriented and (b) 3 vol.% BT textured PYN-PMN-PT ceramics after  $10^6$  bipolar cycles.
